# Supplementary material for: Stanford Accelerated Intelligent Neuromodulation Therapy for Treatment-Resistant Depression
Source: Atypon-hosted journal article supplement (doi:10.1176/appi.ajp.2019.19070720), 2020-04-07
Supplement: appi.ajp.2019.19070720.ds001.pdf [file appi.ajp.2019.19070720.ds001.pdf]

 


Psychiatry Online
